# Supplementary material for: Microporous Polymelamine Framework Functionalized with Re(I) Tricarbonyl Complexes for CO2 Absorption and Reduction
Source: MDPI journal article supplement (doi:10.3390/polym14245472), 2022-12-14
Supplement: s1 [file s1]

## FTIR

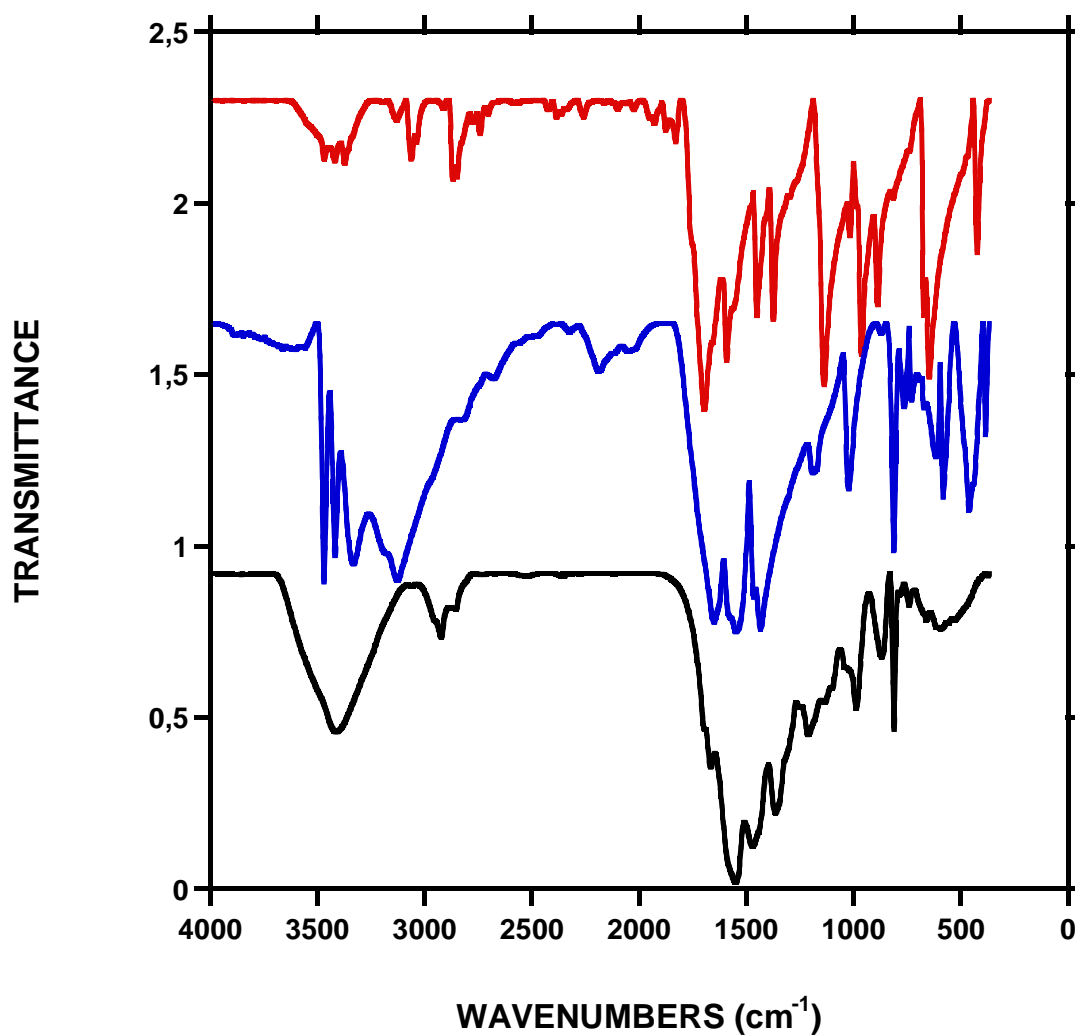

**Figure S1.** FTIR spectra of benzene-1,3,5-tricarboxaldehyde (red), melamine (blue), and POP (black). Applied shift in transmittance is due to ease the view of the spectra.

### $^{13}\text{C}$ CP/MAS NMR

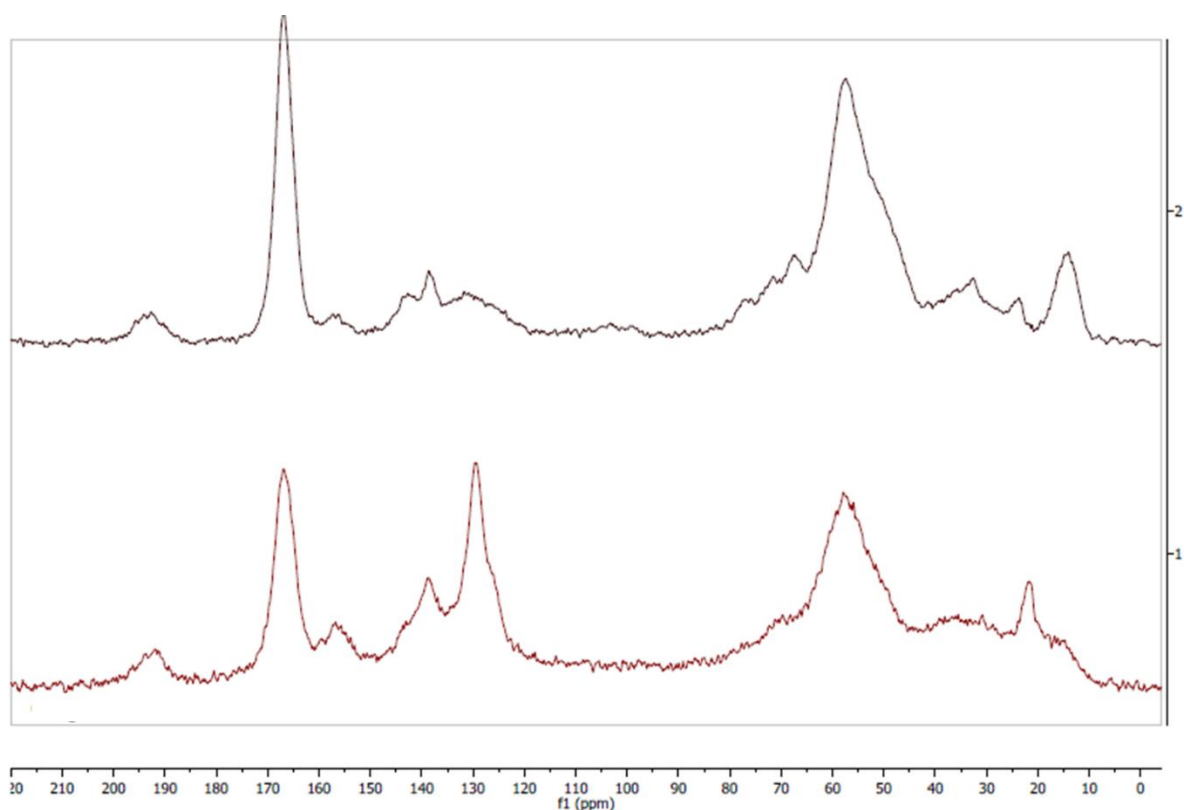

**Figure S2.** Solid state  $^{13}\text{C}$  CP-MAS NMR spectrum for POP (above black trace) and Re@POP (below red trace)

### ICP-OES

The stoichiometric composition of Re-polymer material is not defined but is known that Re content does not exceed 13% by weight. Consequently, taking the approximate model suggested in ref. 23 (see Scheme 1), an average molecular weight derived close to 934 is derived; by adding  $\text{Re}(\text{CO})_3\text{Cl}$  a total Mw over 1240 results. From this a Re content over 15% is calculated, to be compared with 22% derived from ICP-OES. It is concluded that *single* Rhenium per Re@POP molecule is present, clearly in the limit of the model approximation.

## XPS of Re@POP2

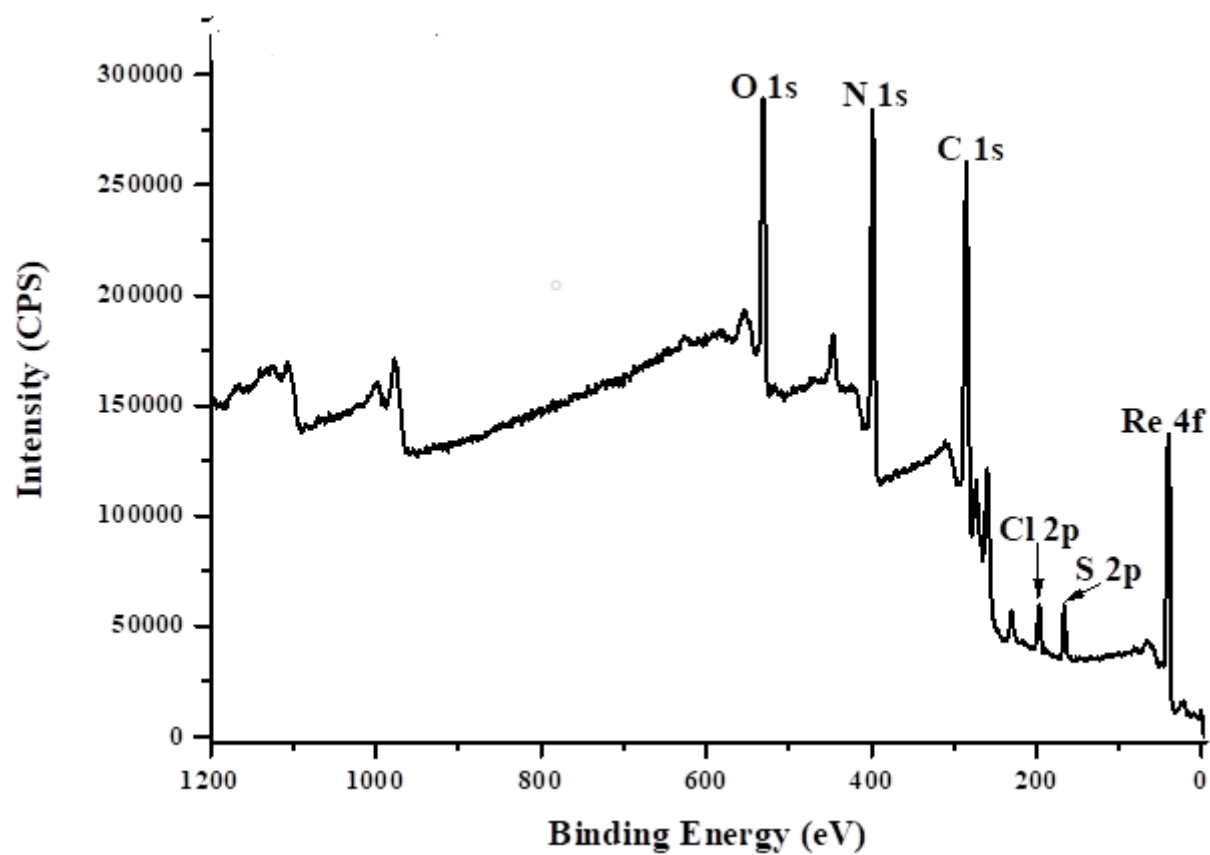

**Figure S3.** Wide scan XPS spectrum of the Re@POP2 sample

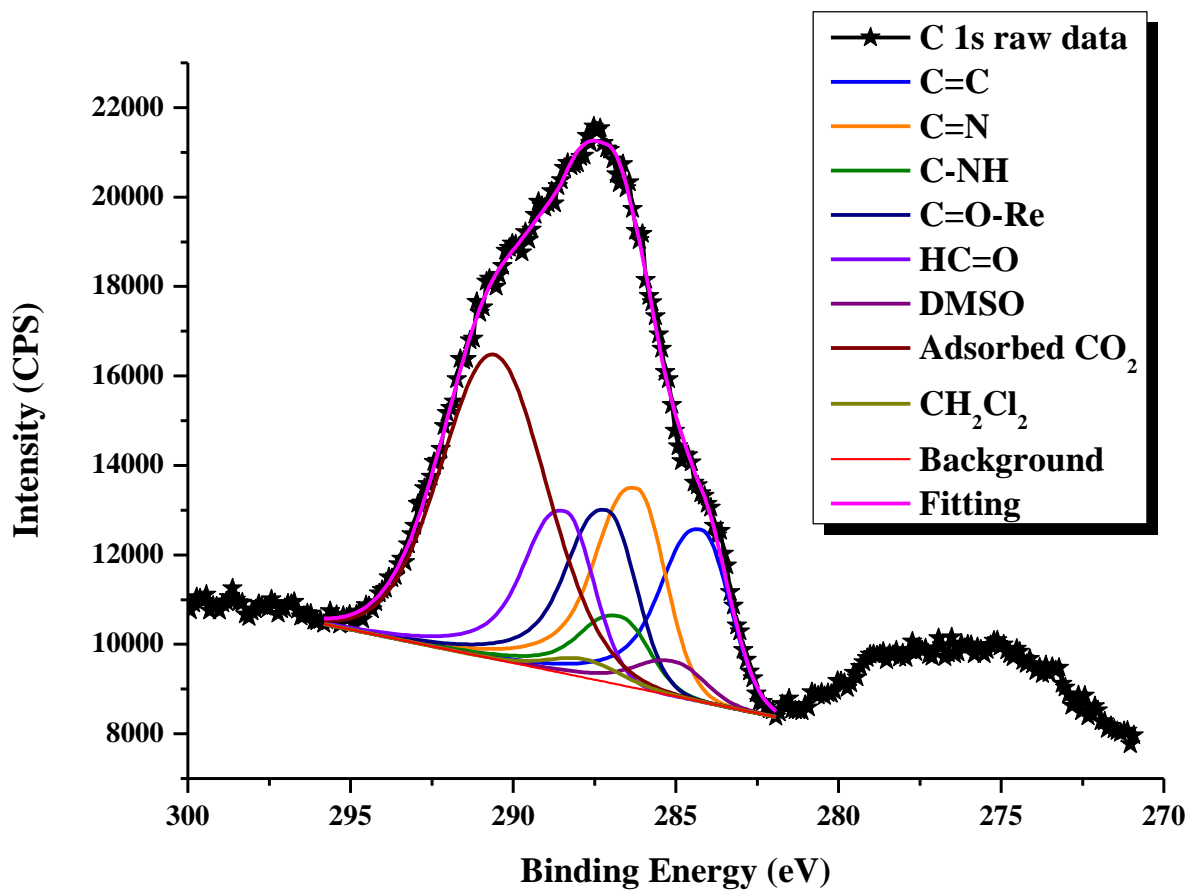

Figure S4. C 1s high resolution spectrum of the Re@POP2 sample

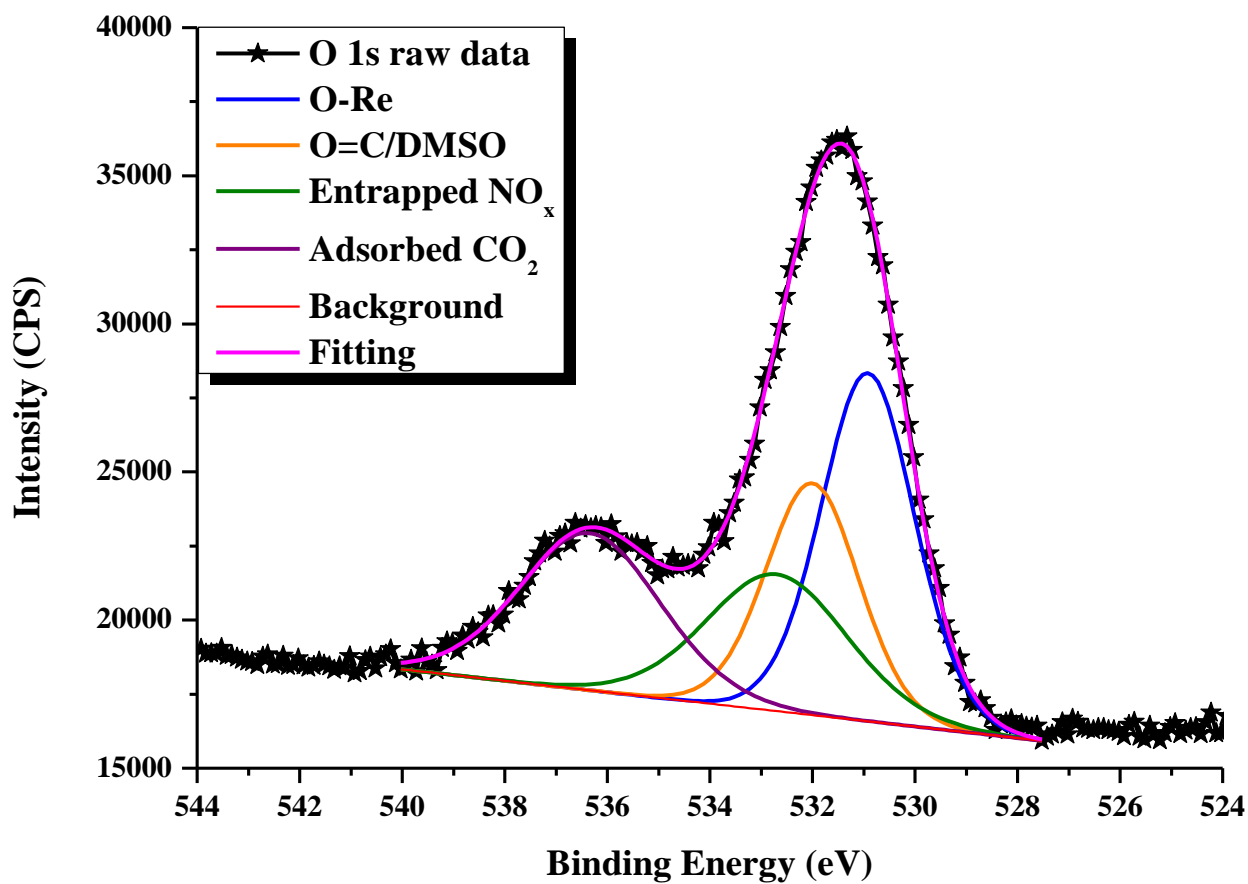

Figure S5. O 1s high resolution spectrum of the Re@POP2 sample

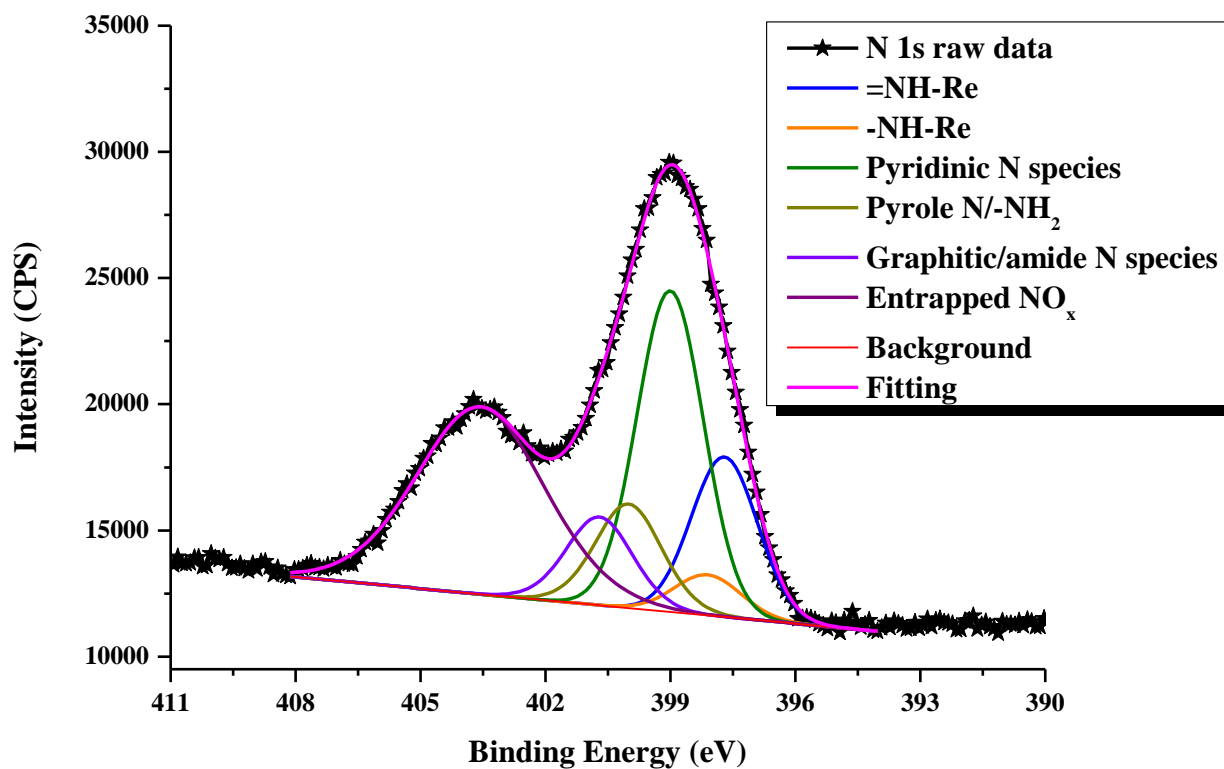

**Figure S6.** N 1s high resolution spectrum of the Re@POP2 sample

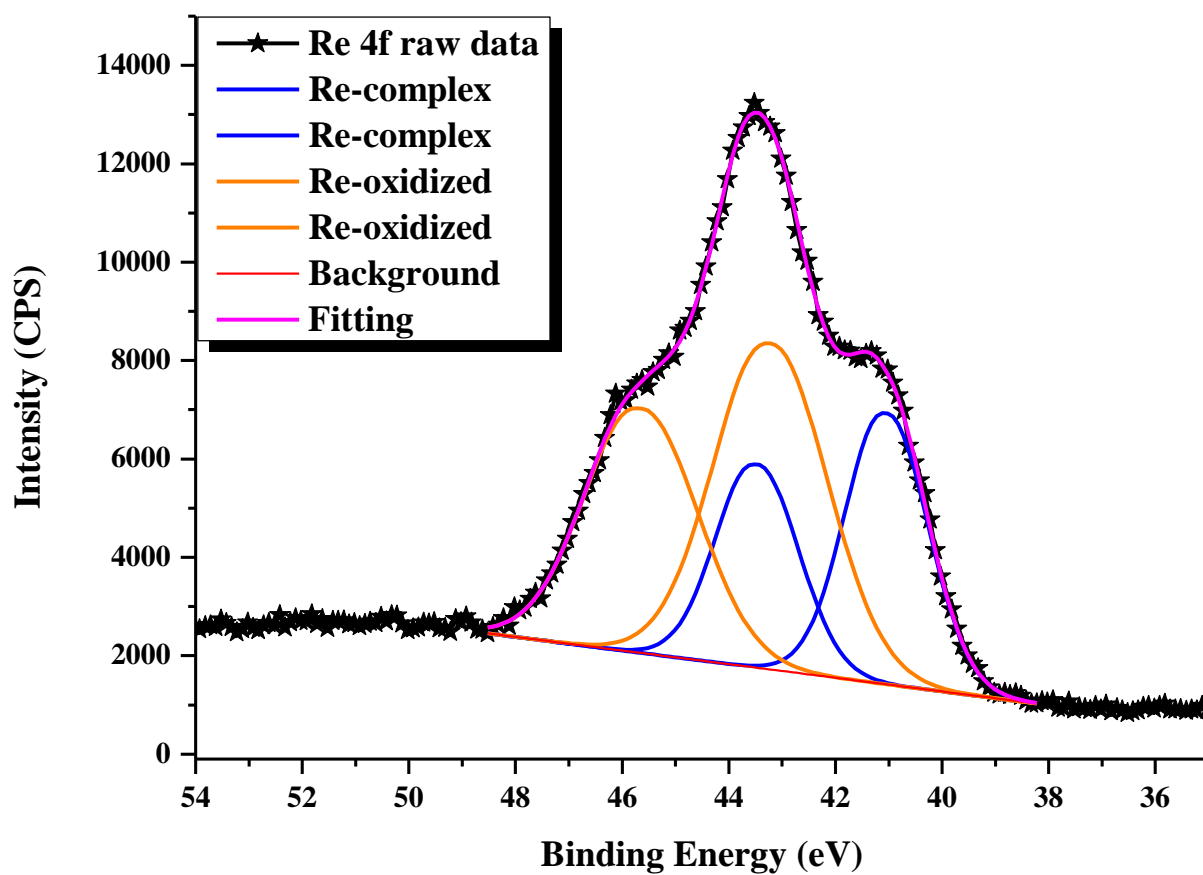

**Figure S7.** Re 4f high resolution spectrum of the Re@POP2 sample

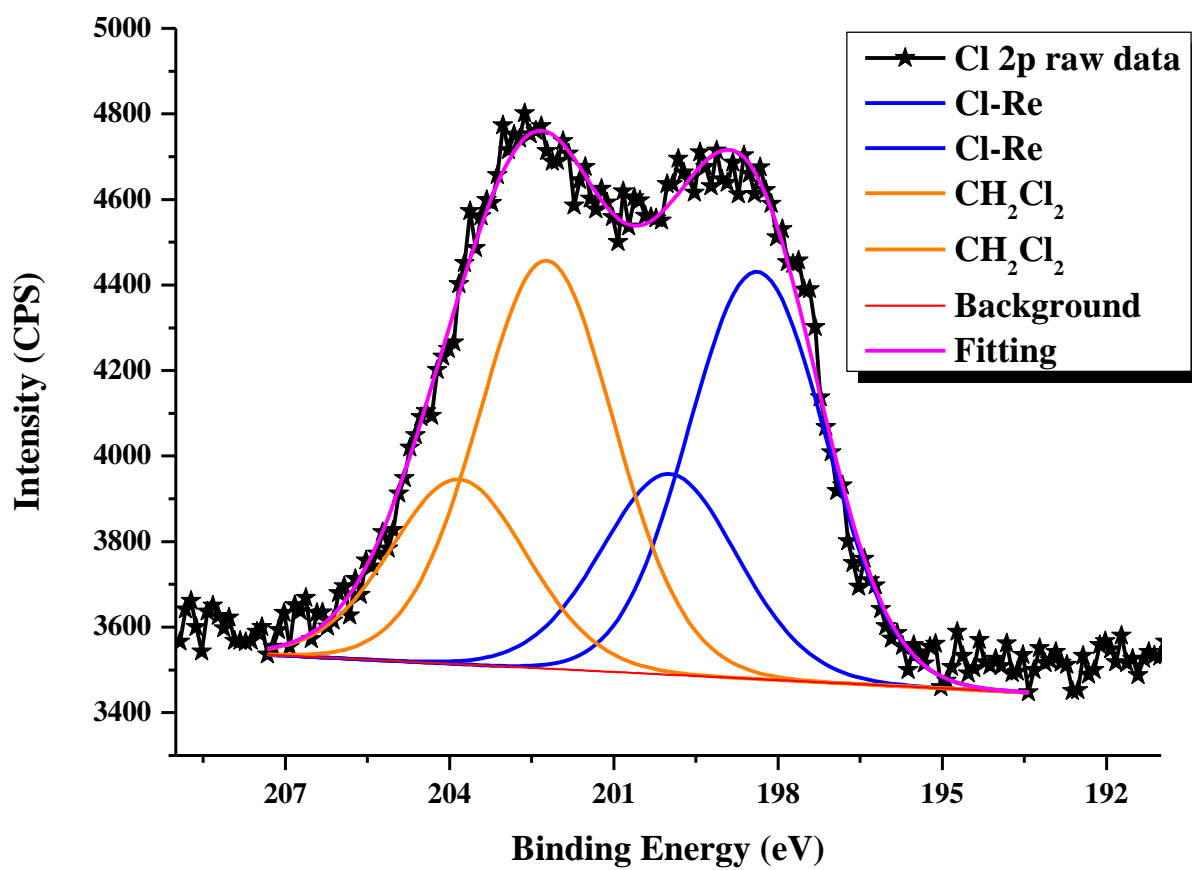

**Figure S8.** Cl 2p high resolution spectrum of the Re@POP1 sample

## SEM IMAGES AT MEDIUM MAGNIFICATION

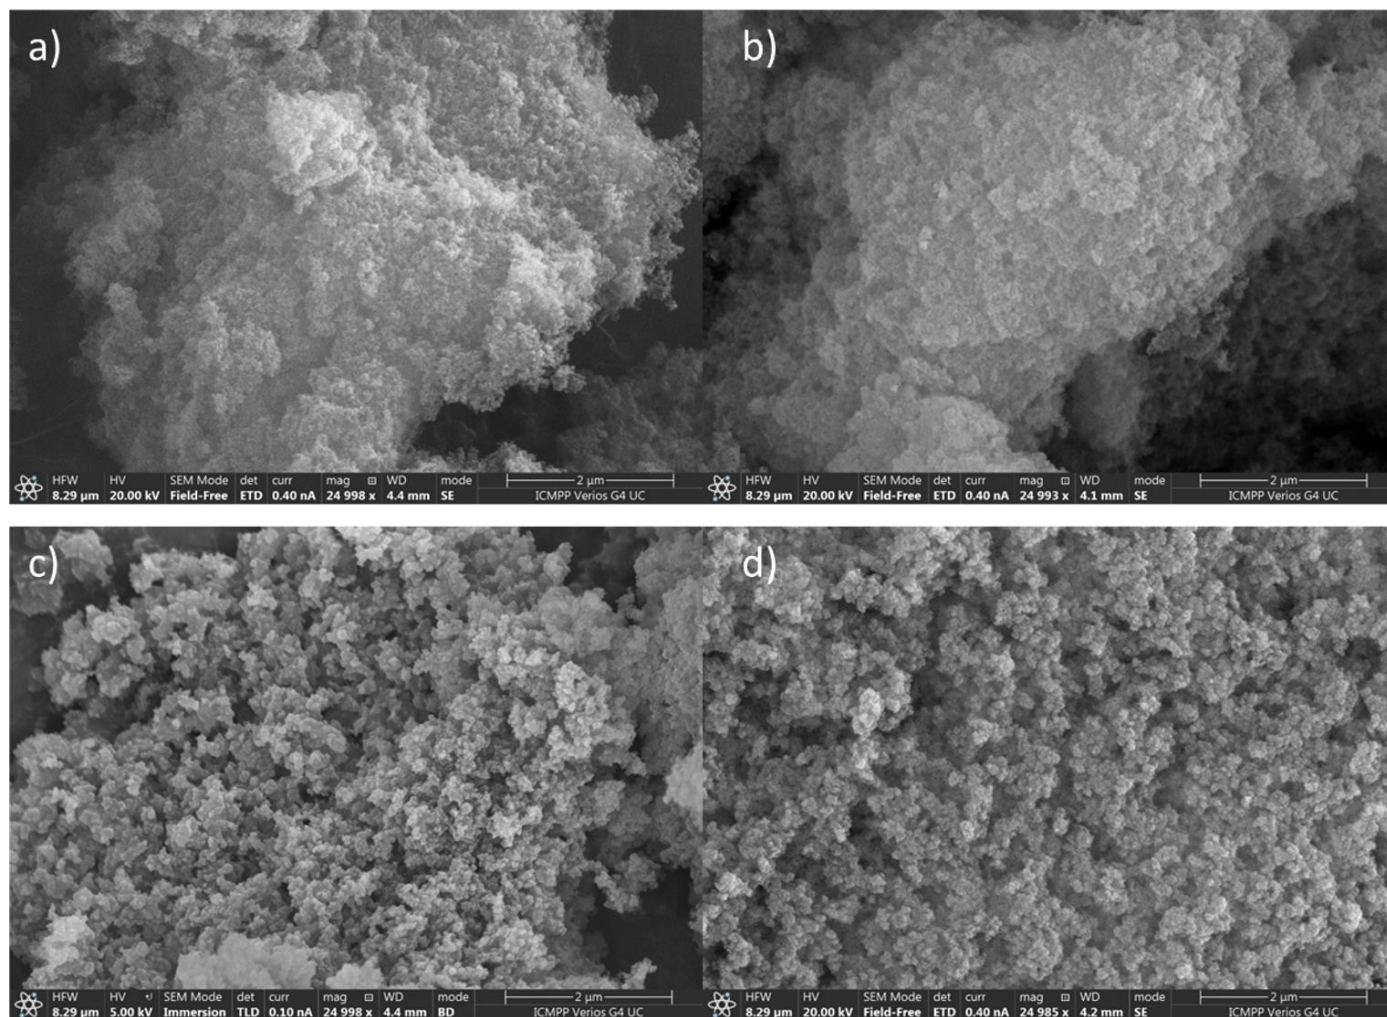

**Figure S9.** SEM images taken at 2 μm magnification. **a)** POP1, **b)** Re@POP1, **c)** POP2, **d)** Re@POP2.
